# Supplementary material for: Hydrazine bisalane is a potential compound for chemical hydrogen storage. A theoretical study
Source: Royal Society of Chemistry journal article supplement (doi:10.1039/c1dt10472a), 2011-01-01
Supplement: c1dt10472a.pdf [file c1dt10472a.pdf]

## Electronic Supplementary Information for:

### **Hydrazine Bisalane Is a Potential Compound for Chemical Hydrogen Storage. A Theoretical Study**

Vinh Son Nguyen,<sup>1,3</sup> Saartje Swinnen,<sup>1</sup> Jerzy Leszczynski<sup>2</sup> and Minh Tho Nguyen,<sup>1,\*</sup>

<sup>1</sup>Department of Chemistry, University of Leuven, B-3001 Leuven, Belgium

<sup>2</sup>Interdisciplinary Center for Nanotoxicity, Department of Chemistry, Jackson State University, Jackson, MS 39217, USA

<sup>3</sup>Faculty of Chemistry, and Center for Computational Science, Hanoi National University of Education, Hanoi, Vietnam

**Table S-1.** Total and zero-point energy of equilibrium structures for the formation of hydrazine bisalane calculated with CCSD(T)<sup>a</sup>

| Structures                  | Basis set    |              |                   |
|-----------------------------|--------------|--------------|-------------------|
|                             | aVDZ         | aVTZ         | ZPE <sup>b)</sup> |
| <b>dalhyz-C</b>             | -599.1724904 | -599.3336256 | 63.57254          |
| <b>dalhyz-T</b>             | -599.1719083 | -599.3329035 | 63.55218          |
| <b>alalhyz-C</b>            | -599.1692140 | -599.3282289 | 62.76711          |
| <b>alalhyz-T</b>            | -599.1722220 | -599.3317652 | 63.12794          |
| <b>alhyzal-C</b>            | -599.1713484 | -599.3302177 | 62.84847          |
| <b>alhyzal-T</b>            | -599.1750607 | -599.3342943 | 62.81733          |
| <b>TS-dalhyz-C-T</b>        | -599.1522476 | -599.3114301 | 62.79258          |
| <b>TS-dalhyz-alalhyz-C</b>  | -599.1633615 | -599.3241562 | 62.92873          |
| <b>TS-dalhyz-alalhyz-T</b>  | -599.1655406 | -599.3267311 | 63.03292          |
| <b>TS-alalhyz-T-C</b>       | -599.1486009 | -599.3078810 | 62.02438          |
| <b>TS-alalhyz-alhyzal-C</b> | -599.1557346 | -599.3147632 | 62.80286          |

- a) All energy values are given in hartrees.
- b) The harmonic vibrational frequencies were calculated using the MP2/aVDZ method.

**Table S-2.** Total and zero-point energy of transition states and products for H<sub>2</sub>-release from **alhyzal-C** and **alhyzal-T** calculated using CCSD(T) method <sup>a)</sup>

| TS's and Prod's         | Basis set    |              |                   |
|-------------------------|--------------|--------------|-------------------|
|                         | aVDZ         | aVTZ         | ZPE <sup>b)</sup> |
| <b>TS12-alhyzal-C</b>   | -599.1254621 | -599.2869107 | 59.70718          |
| <b>TS13-alhyzal-C</b>   | -599.1294626 | -599.2916108 | 60.02457          |
| <b>TS12-alhyzal-T</b>   | -599.1215966 | -599.2828317 | 59.35337          |
| <b>TS13-alhyzal-T</b>   | -599.1288088 | -599.2915843 | 59.75846          |
| <b>p-TS12-alhyzal-C</b> | -598.0092773 | -598.1658655 | 51.22086          |
| <b>p-TS12-alhyzal-T</b> | -597.9899651 | -598.1462259 | 50.28833          |
| <b>p-TS13-alhyzal</b>   | -597.9990971 | -598.1560254 | 50.15743          |

<sup>a)</sup> All energy values are given in hartrees.

<sup>b)</sup> The harmonic vibrational frequencies were calculated using the MP2/aVDZ method.

**Figure S1.** Geometries of the Structures Considered Optimized at the MP2/aug-cc-pVTZ Level of Theory, Given in Cartesian Coordinates (Å). Bond lengths are given in angstrom (Å) and Bond angles in degrees (°).

1) *Cis* Hydrazine bisalane (**alhyzal-C**)

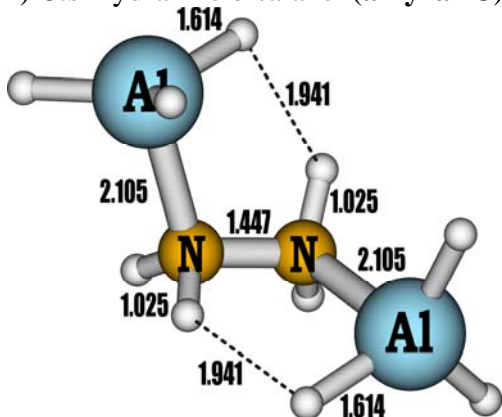

|    |           |           |           |
|----|-----------|-----------|-----------|
| N  | -0.516479 | 0.758554  | -0.506340 |
| N  | 0.516479  | 0.758553  | 0.506340  |
| Al | 2.137321  | -0.448818 | -0.081797 |
| Al | -2.137321 | -0.448818 | 0.081796  |
| H  | -3.319730 | 0.477378  | -0.452798 |
| H  | -0.881214 | 1.698532  | -0.637492 |
| H  | -1.725761 | -0.276844 | 1.632935  |
| H  | -1.840713 | -1.841681 | -0.613527 |
| H  | 3.319730  | 0.477379  | 0.452798  |
| H  | -0.048127 | 0.467374  | -1.369813 |
| H  | 1.840715  | -1.841681 | 0.613526  |
| H  | 1.725760  | -0.276843 | -1.632935 |
| H  | 0.881214  | 1.698531  | 0.637493  |
| H  | 0.048127  | 0.467374  | 1.369813  |

2) *Trans* Hydrazine bisalane (**alhyzal-T**)

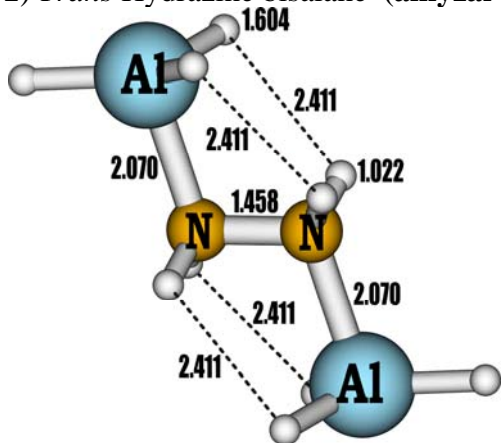

|    |           |           |           |
|----|-----------|-----------|-----------|
| N  | 0.429046  | 0.589526  | 0.000000  |
| N  | -0.429058 | -0.589526 | 0.000001  |
| Al | -2.393197 | 0.067742  | 0.000000  |
| Al | 2.393205  | -0.067744 | 0.000000  |
| H  | 3.263833  | 1.258624  | 0.000002  |
| H  | 0.130397  | 1.135445  | 0.810286  |
| H  | 2.211551  | -0.919499 | -1.347229 |
| H  | 2.211550  | -0.919502 | 1.347227  |
| H  | -3.263846 | -1.258613 | -0.000014 |
| H  | 0.130395  | 1.135445  | -0.810285 |
| H  | -2.211545 | 0.919491  | 1.347231  |
| H  | -2.211534 | 0.919509  | -1.347219 |
| H  | -0.130409 | -1.135447 | -0.810283 |
| H  | -0.130409 | -1.135445 | 0.810287  |

3) *Cis* Dialane Hydrazine (**dalhyz-C**)

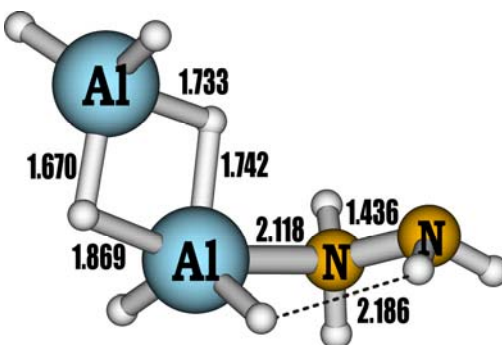

|    |           |           |           |
|----|-----------|-----------|-----------|
| N  | -1.821237 | 0.190928  | -0.515507 |
| N  | -2.325266 | -0.978392 | 0.147957  |
| Al | 0.030694  | 0.823811  | 0.293121  |
| Al | 2.335509  | -0.432651 | -0.106998 |
| H  | -2.454391 | 0.985414  | -0.444826 |
| H  | 0.670497  | -0.545337 | -0.574065 |
| H  | 0.006687  | 2.195718  | -0.508418 |
| H  | -1.723593 | -0.032214 | -1.500973 |
| H  | -0.493102 | 0.503425  | 1.765975  |
| H  | 3.156787  | -0.031790 | -1.395533 |
| H  | 1.837654  | 0.902319  | 0.764156  |
| H  | 2.654820  | -1.667329 | 0.824355  |
| H  | -3.337235 | -0.997496 | 0.100417  |
| H  | -2.053245 | -0.885541 | 1.122158  |

4) *Trans* Dialane Hydrazine (**dalhyz-T**)

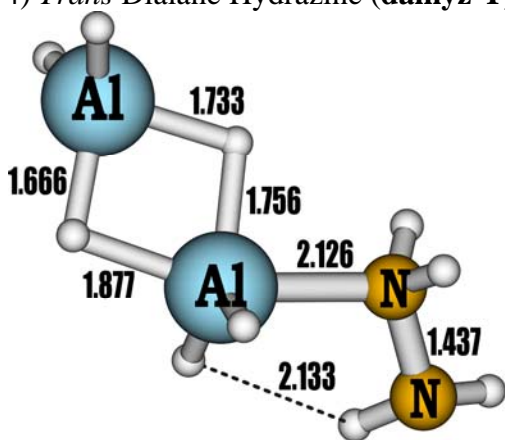

|    |           |           |           |
|----|-----------|-----------|-----------|
| N  | -1.659347 | -0.647208 | 0.265720  |
| N  | -2.836292 | 0.022953  | -0.213725 |
| Al | 0.007576  | 0.664434  | 0.125724  |
| Al | 2.498063  | -0.261772 | -0.107152 |
| H  | 3.304451  | -0.520247 | 1.225882  |
| H  | -1.469458 | -1.509383 | -0.240080 |
| H  | 0.888452  | -0.854986 | 0.142320  |
| H  | 2.948482  | -0.744649 | -1.543135 |
| H  | 1.774430  | 1.238119  | -0.140025 |
| H  | -1.819974 | -0.885670 | 1.239178  |
| H  | -0.506292 | 1.166573  | -1.298690 |
| H  | -0.171053 | 1.322459  | 1.553771  |
| H  | -2.536535 | 0.578797  | -1.009520 |
| H  | -3.516335 | -0.655835 | -0.535107 |

5) *Cis* Alane Alane Hydrazine (**alalhyz-C**)

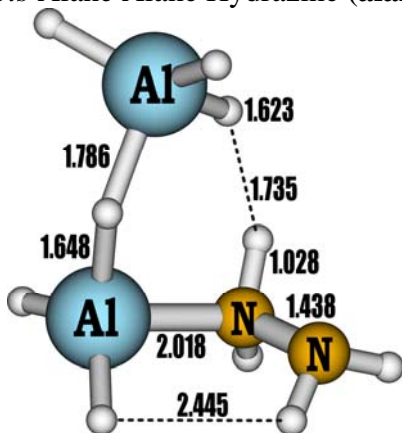

|    |           |           |           |
|----|-----------|-----------|-----------|
| N  | 1.279909  | -0.351533 | 0.626088  |
| N  | 1.801345  | -1.181029 | -0.425856 |
| Al | 0.442701  | 1.317788  | -0.137738 |
| Al | -2.173966 | -0.431759 | -0.027028 |
| H  | 0.208279  | 2.252632  | 1.114621  |
| H  | 1.961135  | -0.157174 | 1.357719  |
| H  | -0.954334 | 0.669906  | -0.725651 |
| H  | 1.434433  | 1.647458  | -1.332092 |
| H  | -3.270935 | 0.589516  | 0.493117  |
| H  | 0.482739  | -0.849768 | 1.041578  |
| H  | -2.442733 | -1.366667 | -1.280216 |
| H  | -1.235252 | -1.075224 | 1.130186  |
| H  | 2.368138  | -0.591585 | -1.024994 |
| H  | 2.386193  | -1.909540 | -0.033921 |

6) *Trans* Alane Alane Hydrazine (**alalhyz-T**,  $\text{AlH}_3\text{AlH}_3\text{N}_2\text{H}_4$ )

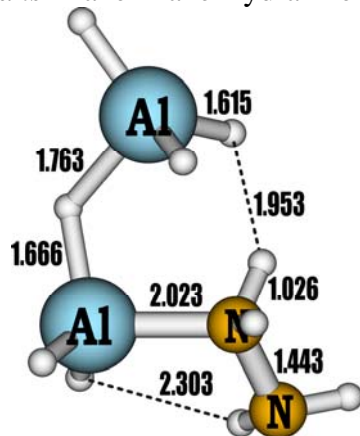

|    |           |           |           |
|----|-----------|-----------|-----------|
| N  | -0.979524 | -0.604533 | 0.302966  |
| Al | -0.347349 | 1.291059  | -0.014665 |
| N  | -2.357460 | -0.762616 | -0.093828 |
| Al | 2.147025  | -0.443114 | -0.056280 |
| H  | -1.175896 | 1.626105  | -1.327644 |
| H  | -0.910539 | -0.830141 | 1.291330  |
| H  | 1.233145  | 1.010312  | -0.458814 |
| H  | -0.447356 | 2.089037  | 1.340043  |
| H  | 1.391948  | -1.458185 | -1.060059 |
| H  | -0.344754 | -1.239181 | -0.193025 |
| H  | 3.646145  | -0.016265 | -0.313785 |
| H  | 1.574602  | -0.653395 | 1.431960  |
| H  | -2.471839 | -0.240675 | -0.956743 |
| H  | -2.532351 | -1.740854 | -0.294945 |

7) p-TS13-alhyzal

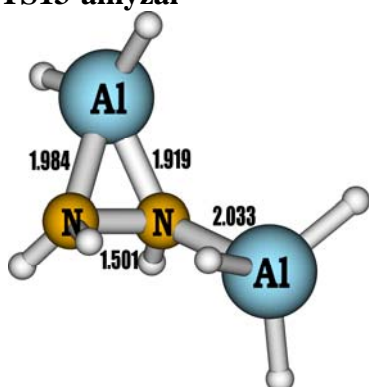

|    |           |           |           |
|----|-----------|-----------|-----------|
| N  | -0.018246 | 0.151192  | -0.592718 |
| N  | 0.636545  | 1.148026  | 0.319176  |
| Al | 1.658117  | -0.530731 | 0.046905  |
| Al | -1.894464 | -0.264916 | 0.071702  |
| H  | -2.809772 | 0.624027  | -0.894931 |
| H  | -0.038274 | 0.556906  | -1.523393 |
| H  | -1.612146 | 0.392914  | 1.530878  |
| H  | -2.027438 | -1.850805 | -0.000042 |
| H  | 2.858581  | -0.271025 | -0.937860 |
| H  | 1.572848  | -1.517577 | 1.260249  |
| H  | 0.821968  | 2.025220  | -0.153250 |
| H  | -0.021356 | 1.289227  | 1.091255  |

8) p-TS12-alhyzal-C

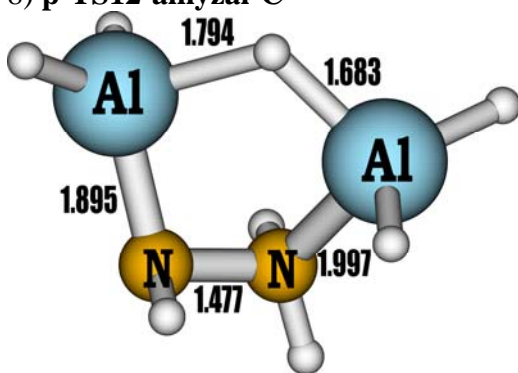

|    |           |           |           |
|----|-----------|-----------|-----------|
| N  | 0.613440  | 1.108497  | 0.358618  |
| N  | -0.649193 | 1.091161  | -0.407446 |
| Al | -1.522144 | -0.514179 | 0.095024  |
| Al | 1.456243  | -0.645530 | -0.090275 |
| H  | 2.497420  | -1.091527 | 1.015699  |
| H  | 1.115774  | 1.966694  | 0.142913  |
| H  | 1.792912  | -0.491951 | -1.629911 |
| H  | -0.001225 | -1.465745 | 0.095770  |
| H  | 0.334041  | 1.203967  | 1.334006  |
| H  | -2.501391 | -1.156127 | -0.963136 |
| H  | -1.763623 | -0.446944 | 1.665503  |
| H  | -0.366937 | 1.160244  | -1.380786 |

9) p-TS12-alhyzal-T

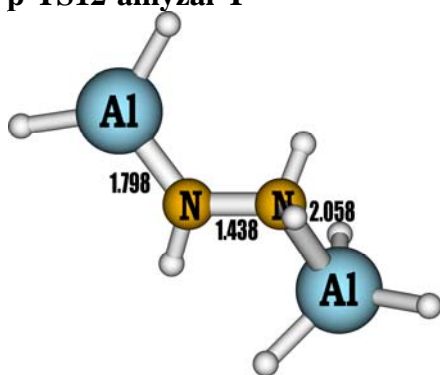

|    |           |           |           |
|----|-----------|-----------|-----------|
| N  | -0.453615 | 0.723942  | -0.263149 |
| N  | 0.607820  | -0.230209 | -0.437444 |
| Al | 2.290785  | -0.077550 | 0.176085  |
| Al | -2.221285 | -0.227569 | 0.190775  |
| H  | -3.282731 | 0.893633  | -0.223950 |
| H  | -0.532908 | 1.301119  | -1.097728 |
| H  | -1.995293 | -0.511787 | 1.746715  |
| H  | -1.996643 | -1.460840 | -0.813776 |
| H  | -0.203560 | 1.351112  | 0.497416  |
| H  | 3.256376  | -1.295127 | -0.041336 |
| H  | 2.585778  | 1.314498  | 0.856031  |
| H  | 0.186041  | -1.082198 | -0.788413 |

10) TS-dalhyz-C-T

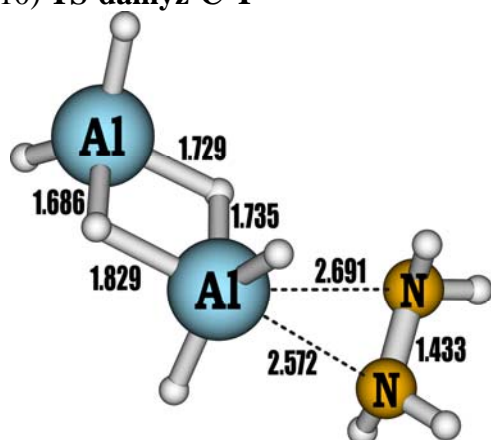

|    |           |           |           |
|----|-----------|-----------|-----------|
| N  | 1.981410  | 1.017325  | -0.031599 |
| N  | 2.451450  | -0.330175 | -0.165718 |
| Al | -0.064606 | -0.714554 | 0.207003  |
| Al | -2.477220 | 0.303571  | -0.104218 |
| H  | 0.363060  | -0.519355 | 1.713839  |
| H  | 2.652354  | 1.700781  | -0.367208 |
| H  | -1.822079 | -1.125514 | 0.504684  |
| H  | 0.181900  | -1.705659 | -0.993930 |
| H  | -0.825464 | 0.722039  | -0.398604 |
| H  | 1.827207  | 1.179928  | 0.957031  |
| H  | -3.192929 | 0.071183  | -1.492417 |
| H  | -3.026998 | 1.228649  | 1.052488  |
| H  | 3.380149  | -0.465384 | 0.221354  |
| H  | 2.476516  | -0.553928 | -1.152213 |

11) TS-dalhyz-alalhyz-T

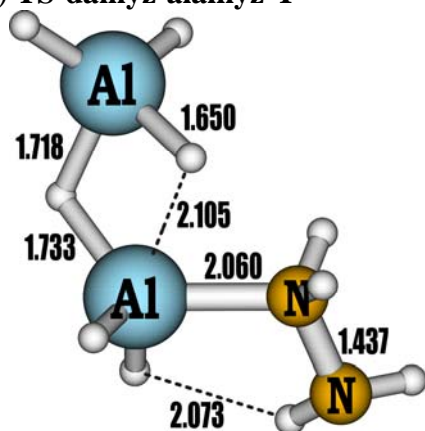

|    |           |           |           |
|----|-----------|-----------|-----------|
| N  | 1.499917  | -0.195870 | 0.628706  |
| N  | 2.224040  | -0.877747 | -0.410016 |
| Al | 0.082439  | 1.078382  | -0.148920 |
| Al | -2.200580 | -0.518568 | -0.005723 |
| H  | -1.307041 | 0.589783  | -1.001922 |
| H  | 1.032754  | 1.418834  | -1.397400 |
| H  | -0.185873 | 2.160614  | 0.971278  |
| H  | 1.039496  | -0.895877 | 1.202308  |
| H  | 2.108772  | 0.354919  | 1.232998  |
| H  | -3.509426 | 0.250887  | 0.434204  |
| H  | -2.199596 | -1.882707 | -0.811193 |
| H  | -0.982865 | -0.417345 | 1.089446  |
| H  | 3.144776  | -1.135596 | -0.075014 |
| H  | 2.327138  | -0.205777 | -1.165168 |

12) TS-dalhyz-alalhyz-C

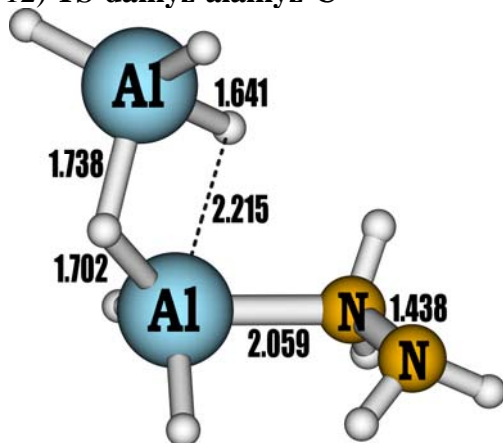

|    |           |           |           |
|----|-----------|-----------|-----------|
| N  | 1.499917  | -0.195870 | 0.628706  |
| N  | 2.224040  | -0.877747 | -0.410016 |
| Al | 0.082439  | 1.078382  | -0.148920 |
| Al | -2.200580 | -0.518568 | -0.005723 |
| H  | -1.307041 | 0.589783  | -1.001922 |
| H  | 1.032754  | 1.418834  | -1.397400 |
| H  | -0.185873 | 2.160614  | 0.971278  |
| H  | 1.039496  | -0.895877 | 1.202308  |
| H  | 2.108772  | 0.354919  | 1.232998  |
| H  | -3.509426 | 0.250887  | 0.434204  |
| H  | -2.199596 | -1.882707 | -0.811193 |
| H  | -0.982865 | -0.417345 | 1.089446  |
| H  | 3.144776  | -1.135596 | -0.075014 |
| H  | 2.327138  | -0.205777 | -1.165168 |



13) TS-alalhyz-T-C

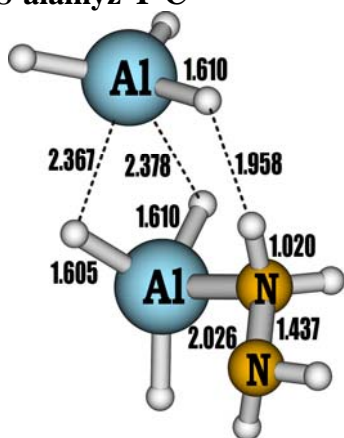

|    |           |           |           |
|----|-----------|-----------|-----------|
| N  | 1.319468  | -0.562139 | 0.363990  |
| Al | 0.209413  | 1.096439  | 0.014877  |
| N  | 2.544266  | -0.566527 | -0.388202 |
| Al | -2.343328 | -0.418578 | -0.067795 |
| H  | -0.882755 | 0.973010  | 1.191576  |
| H  | 1.467139  | -0.699955 | 1.362338  |
| H  | -1.213474 | -1.548454 | 0.131676  |
| H  | 1.325537  | 2.223760  | 0.002408  |
| H  | -0.643276 | 0.691761  | -1.283306 |
| H  | 0.729874  | -1.329944 | 0.041944  |
| H  | -3.005383 | -0.268767 | -1.498635 |
| H  | -3.227072 | -0.050221 | 1.195182  |
| H  | 3.181769  | -1.253903 | -0.003524 |
| H  | 2.962397  | 0.351189  | -0.282232 |

14) TS-alalhyz-alhyzal-C

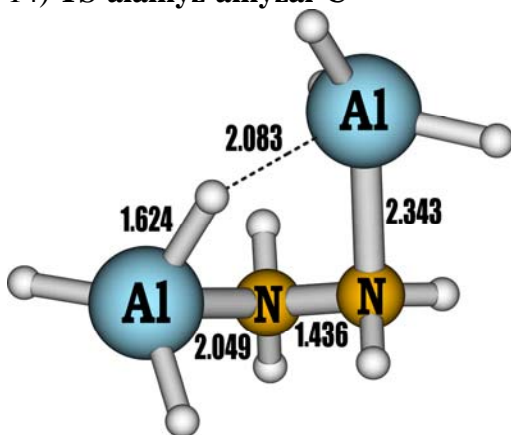

|    |           |           |           |
|----|-----------|-----------|-----------|
| N  | 0.791030  | 1.002375  | 0.518277  |
| Al | 1.568002  | -0.778678 | -0.131515 |
| N  | -0.260886 | 1.183518  | -0.441892 |
| Al | -1.806432 | -0.503292 | 0.070894  |
| H  | 2.094205  | -0.260944 | -1.547149 |
| H  | 0.297153  | 0.830716  | 1.400898  |
| H  | 0.061113  | -1.375278 | -0.237050 |
| H  | 2.533119  | -1.332432 | 0.992175  |
| H  | -2.730579 | 0.423486  | -0.864026 |
| H  | 1.390983  | 1.818514  | 0.606330  |
| H  | -2.216478 | -2.039094 | 0.002566  |
| H  | -1.422595 | 0.051114  | 1.551415  |
| H  | 0.157136  | 1.203349  | -1.369355 |
| H  | -0.775477 | 2.044929  | -0.282429 |

15) TS12-alhyzal-C

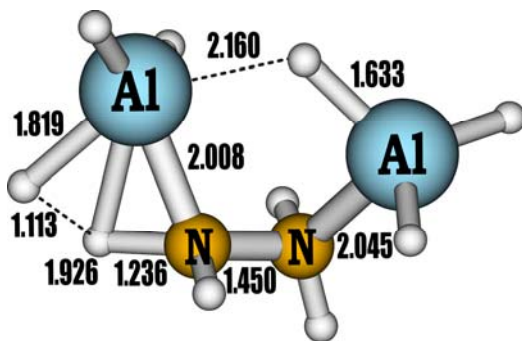

|    |           |           |           |
|----|-----------|-----------|-----------|
| N  | 0.659269  | 1.095940  | 0.401839  |
| Al | 1.661616  | -0.617385 | -0.091695 |
| N  | -0.503734 | 0.970561  | -0.454959 |
| Al | -1.615455 | -0.604702 | 0.105718  |
| H  | 2.772236  | -0.865807 | 1.012302  |
| H  | 1.086274  | 2.012801  | 0.293331  |
| H  | 2.027867  | -0.246006 | -1.597621 |
| H  | 0.294166  | -1.500111 | 0.034690  |
| H  | -2.689094 | 0.845608  | -0.121748 |
| H  | 0.300093  | 1.038930  | 1.355134  |
| H  | -2.186582 | -1.742979 | -0.817772 |
| H  | -1.404523 | -0.500971 | 1.679976  |
| H  | -1.674969 | 1.291958  | -0.226483 |
| H  | -0.214304 | 1.088191  | -1.422258 |



16) TS13-alhyzal-C

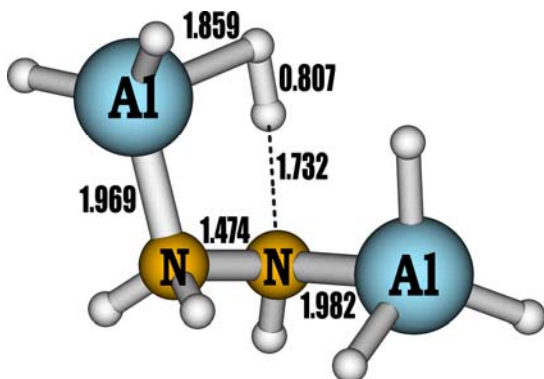

|    |           |           |           |
|----|-----------|-----------|-----------|
| N  | 0.495508  | 0.763167  | 0.630383  |
| Al | 1.889830  | -0.436952 | -0.106578 |
| N  | -0.470864 | 0.887949  | -0.476242 |
| Al | -1.868728 | -0.424787 | -0.028923 |
| H  | 3.219754  | -0.302466 | 0.758926  |
| H  | 0.825852  | 1.699030  | 0.848459  |
| H  | 1.848217  | 0.187000  | -1.617877 |
| H  | 1.049773  | -1.815383 | -0.069220 |
| H  | -3.063136 | 0.393646  | 0.594257  |
| H  | -0.510232 | -0.403232 | 1.422039  |
| H  | -1.967260 | -1.693817 | -0.938899 |
| H  | -1.030679 | -1.011474 | 1.523479  |
| H  | -0.870881 | 1.823993  | -0.479368 |
| H  | 0.051749  | 0.767490  | -1.359266 |

17) TS12-alhyzal-C

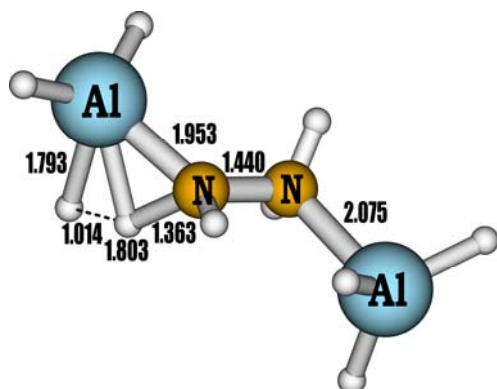

|    |           |           |           |
|----|-----------|-----------|-----------|
| N  | -0.496924 | 0.635894  | 0.022936  |
| Al | -2.420685 | -0.140444 | -0.026141 |
| N  | 0.485425  | -0.414967 | -0.045786 |
| Al | 2.389260  | 0.017062  | -0.081630 |
| H  | -3.217296 | 1.060871  | -0.709234 |
| H  | -0.325283 | 1.311391  | -0.719673 |
| H  | -2.633388 | -0.414456 | 1.531839  |
| H  | -2.024213 | -1.408556 | -0.929847 |
| H  | 2.023205  | -0.327837 | 1.639369  |
| H  | -0.367355 | 1.139259  | 0.900156  |
| H  | 3.309365  | -1.129830 | -0.635499 |
| H  | 2.537069  | 1.581510  | -0.240035 |
| H  | 1.164877  | -0.510506 | 1.132288  |
| H  | 0.022041  | -1.244382 | -0.408391 |

18) TS13-alhyzal-C

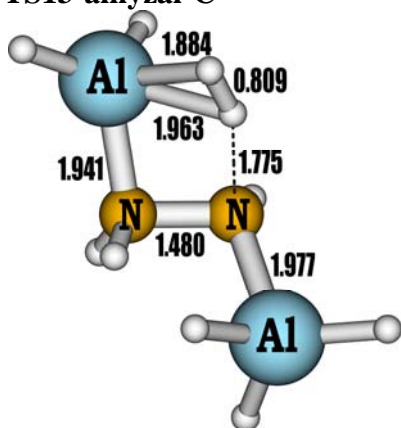

|    |           |           |           |
|----|-----------|-----------|-----------|
| N  | 0.376981  | 0.369575  | -0.534313 |
| Al | 2.200492  | 0.068166  | 0.167681  |
| N  | -0.426219 | -0.788694 | -0.082675 |
| Al | -2.146113 | 0.093609  | 0.093157  |
| H  | 1.595525  | -0.464168 | 1.597840  |
| H  | -0.717379 | 1.401950  | 0.408414  |
| H  | 2.992424  | 1.451605  | 0.159573  |
| H  | 2.776435  | -1.165339 | -0.693058 |
| H  | -2.619696 | 0.579610  | -1.321119 |
| H  | 0.234861  | 0.430030  | -1.539449 |
| H  | -3.028242 | -0.358210 | 1.313560  |
| H  | -1.335490 | 1.593034  | 0.894829  |
| H  | 0.031259  | -1.047846 | 0.806698  |
| H  | -0.291959 | -1.589908 | -0.699267 |
